# Supplementary material for: Fluorescent fiber-optic device sensor based on carbon quantum dot (CQD) thin films for dye detection in water resources
Source: Royal Society of Chemistry journal article supplement (doi:10.1039/d3an01343j), 2023-01-01
Supplement: d3an01343j1.pdf [file d3an01343j1.pdf]

## Supplementary Figures

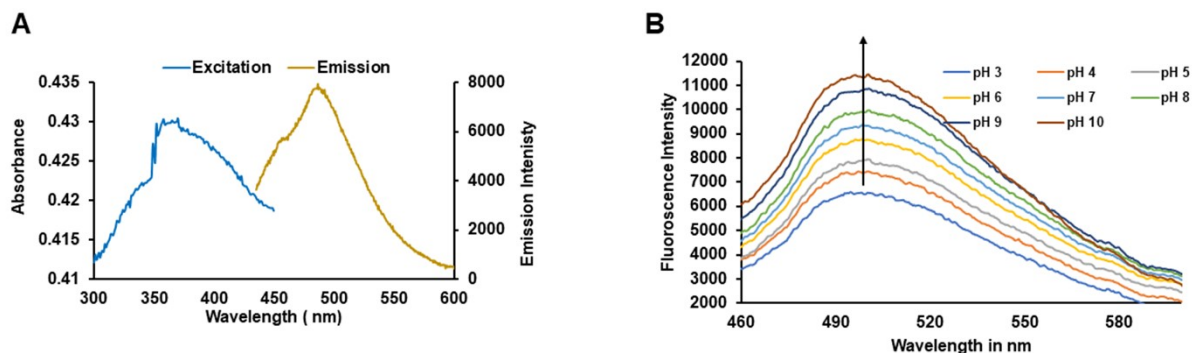

**Fig S1:** Optical spectra of Bare CQDs and pH response overlay of bare CQDs

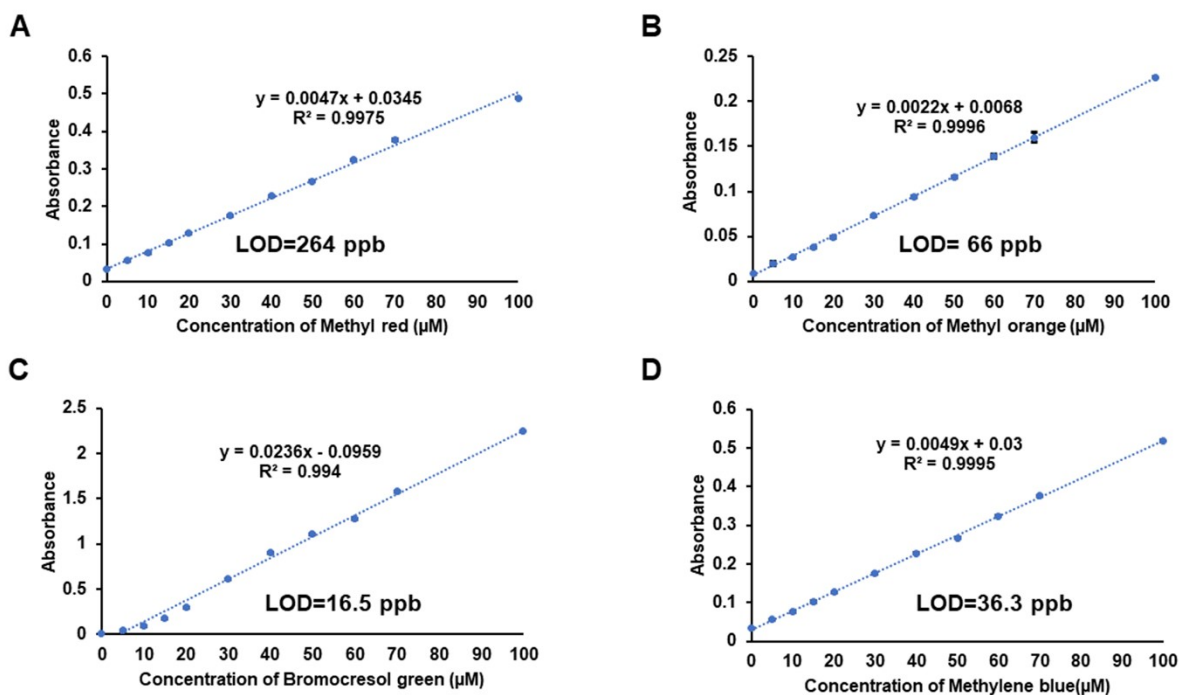

**Fig. S2:** Calibration curve of detection of various dyes with UV-Vis spectrometer.

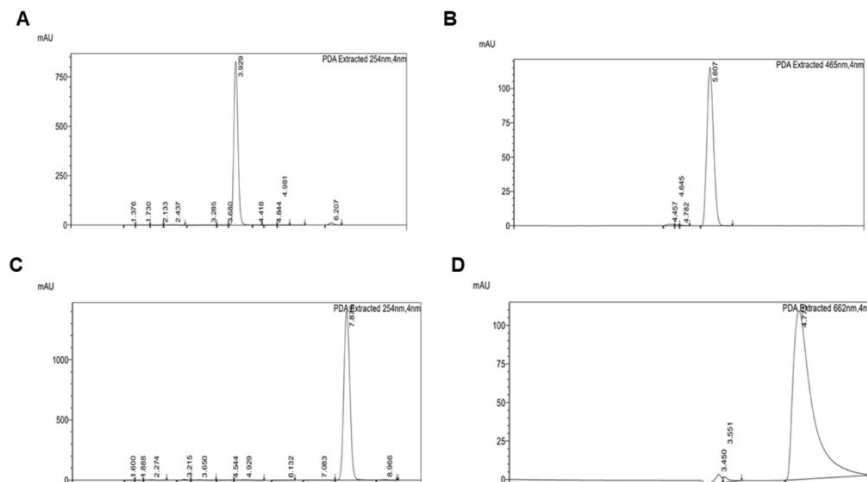

**Fig. S3:** HPLC retention time graph of: A) Bromocresol green, B) Methyl orange, C) Methyl red, D) Methylene blue

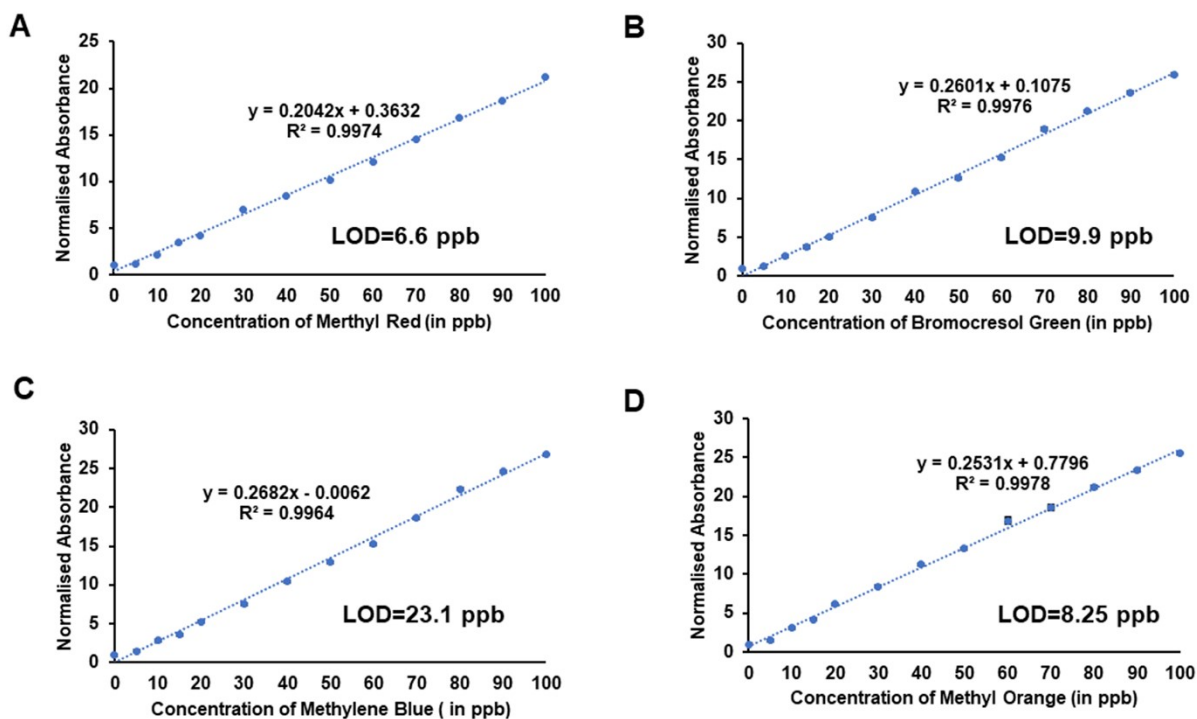

**Fig. S4:** Calibration curve of detection of various dyes with HPLC.

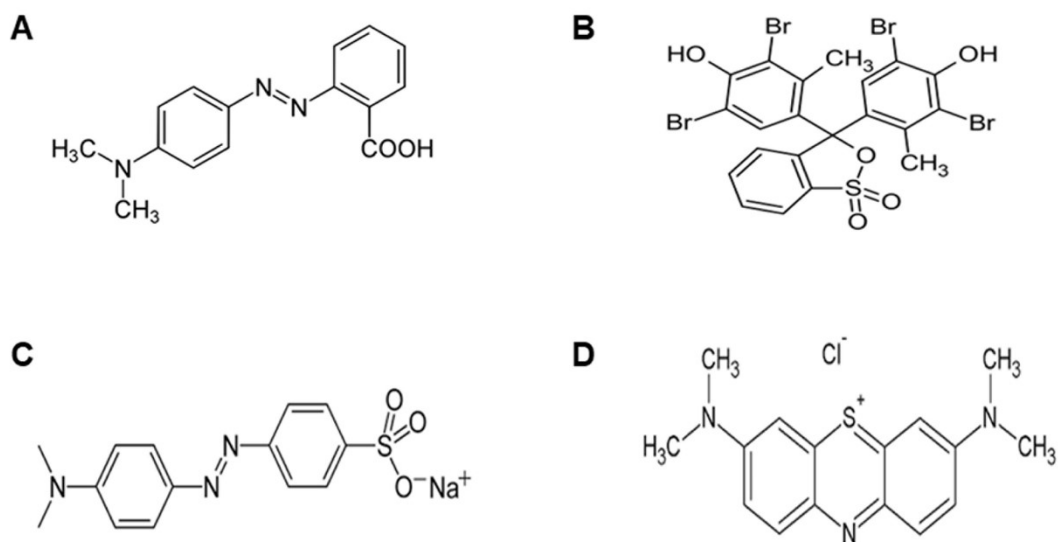

**Fig. S5:** Chemical structure of Dyes: A) Methyl Red, B) Bromocresol Green, C) Methyl Orange, D) Methylene Blue

- **Equation S1:** 
$$Resolution = \frac{Standard\ Deviation}{Slope}$$
- **Equation S2:**  $Limit\ of\ Detection\ (LOD) = 3.3 \times Resolution$
- **Equation S3:** 
$$\%Recovery = \frac{Measured\ Value}{Actual\ Value} \times 100$$
